# Supplementary material
Source: PubMed Central journal article supplement (PMC3366842)
Supplement: supp_M112.352781_Supplem-BhutaniPiccirillo2-9-12.pdf [file supp_M112.352781_Supplem-BhutaniPiccirillo2-9-12.pdf]

**Fig. S1**

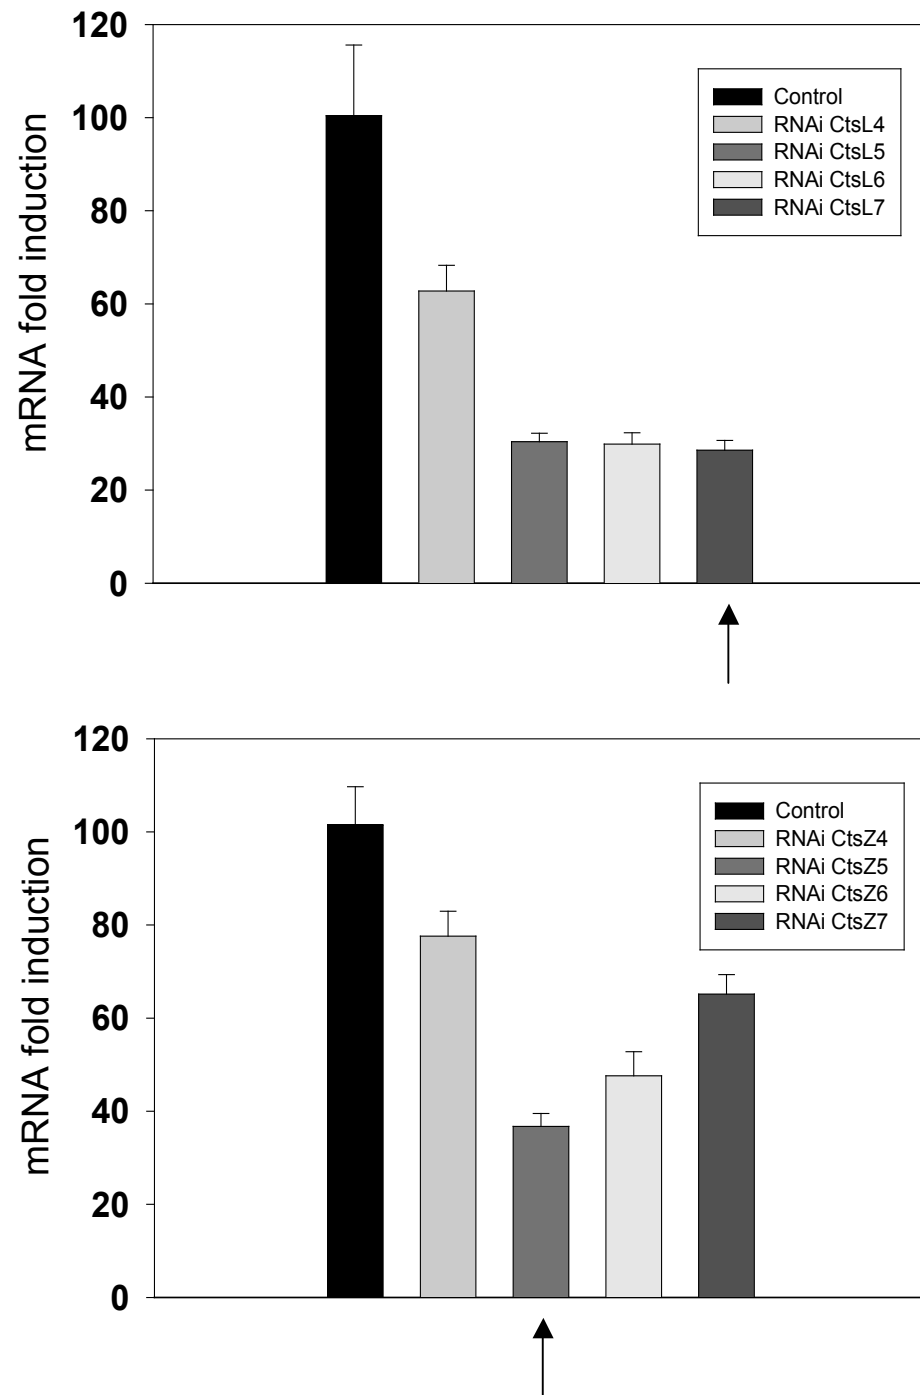

## SUPPLEMENTARY FIGURE LEGENDS

**Figure S1.** The RNAi constructs used reduce the expression of Cathepsin L or Z by 65-70% in N1-E115 cells. N1-E115 cells were transfected for 48h with RNAi constructs against Cathepsin L or Z. The expression levels of these genes was tested by Q-PCR and normalized against an housekeeping gene (*tripeptidyl peptidase II*).

## SUPPLEMENTARY MATERIALS AND METHODS

### RNA isolation, Reverse Transcription and Quantitative Real-Time PCR.

Total RNA was isolated from muscles with TRIzol (Invitrogen). RNA concentration, purity and integrity were measured in a spectrophotometer (Ultrospec 2000, Pharmacia Biotech) and by running a denaturing agarose gel. Analysis of mRNA / mg in muscle was performed using TaqMan reverse transcription reagents (Applied Biosystems). Real-Time PCR reactions were carried out with DyNAmo HS SYBR Green qPCR kit (Finnzymes) and the appropriate primer pairs in an ABI 7900HT fast Real-Time PCR system (Applied Biosystems). We used the following primers:

- for murine Cathepsin L

TCGAGGTTCTTGCTGCTACA, CtslF1

TTCTGTTGCTATGGACGCAA, CtslR1

- for murine Cathepsin Z

TCTGTACGGACAGCAGGATG, CtszF1

TCACCAGGAACCAGCACAT, CtszR1

As housekeeping gene stable in all tissues tested, tripeptidyl peptidase II (Tpp2) gene was used to normalize:

CCTTGAGAGCCTTTGGATAGAA, Tpp2F1

TGGTCTTTCTGGAAGAGTGC, Tpp2R1.
